# Supplementary material for: Genome-wide identification and characteristic analysis of ETS gene family in blood clam Tegillarca granosa
Source: Springer Nature journal article supplement (doi:10.1186/s12864-023-09731-5), 2023-11-21

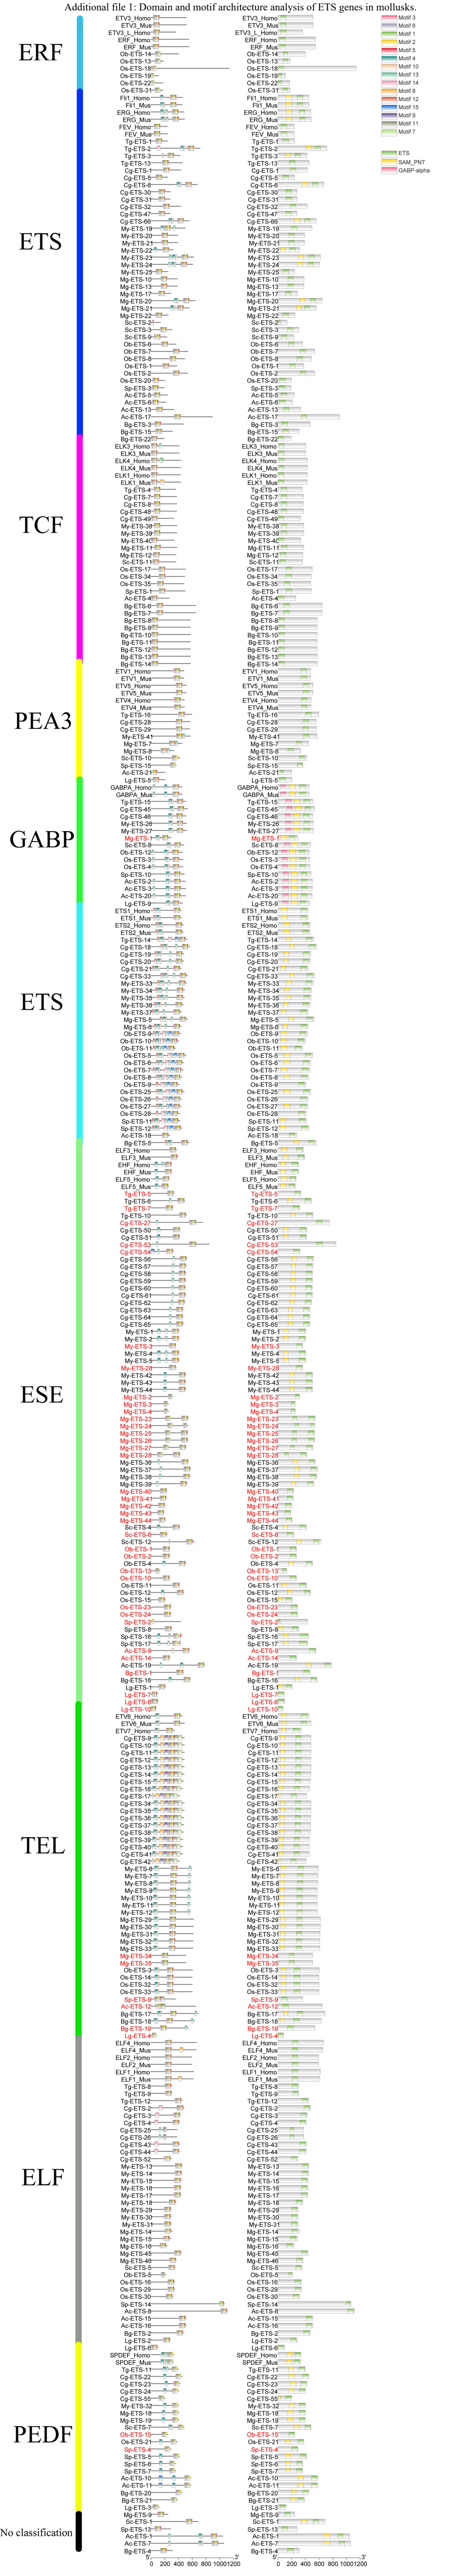

Supplement: MOESM1 [file 12864_2023_9731_MOESM1_ESM.pdf]
