# Supplementary material for: Genome-wide identification and characteristic analysis of ETS gene family in blood clam Tegillarca granosa
Source: Springer Nature journal article supplement (doi:10.1186/s12864-023-09731-5), 2023-11-21

Additional file 2: Heatmap of mRNA expression levels of ETS genes in different developmental stages and adult tissues.

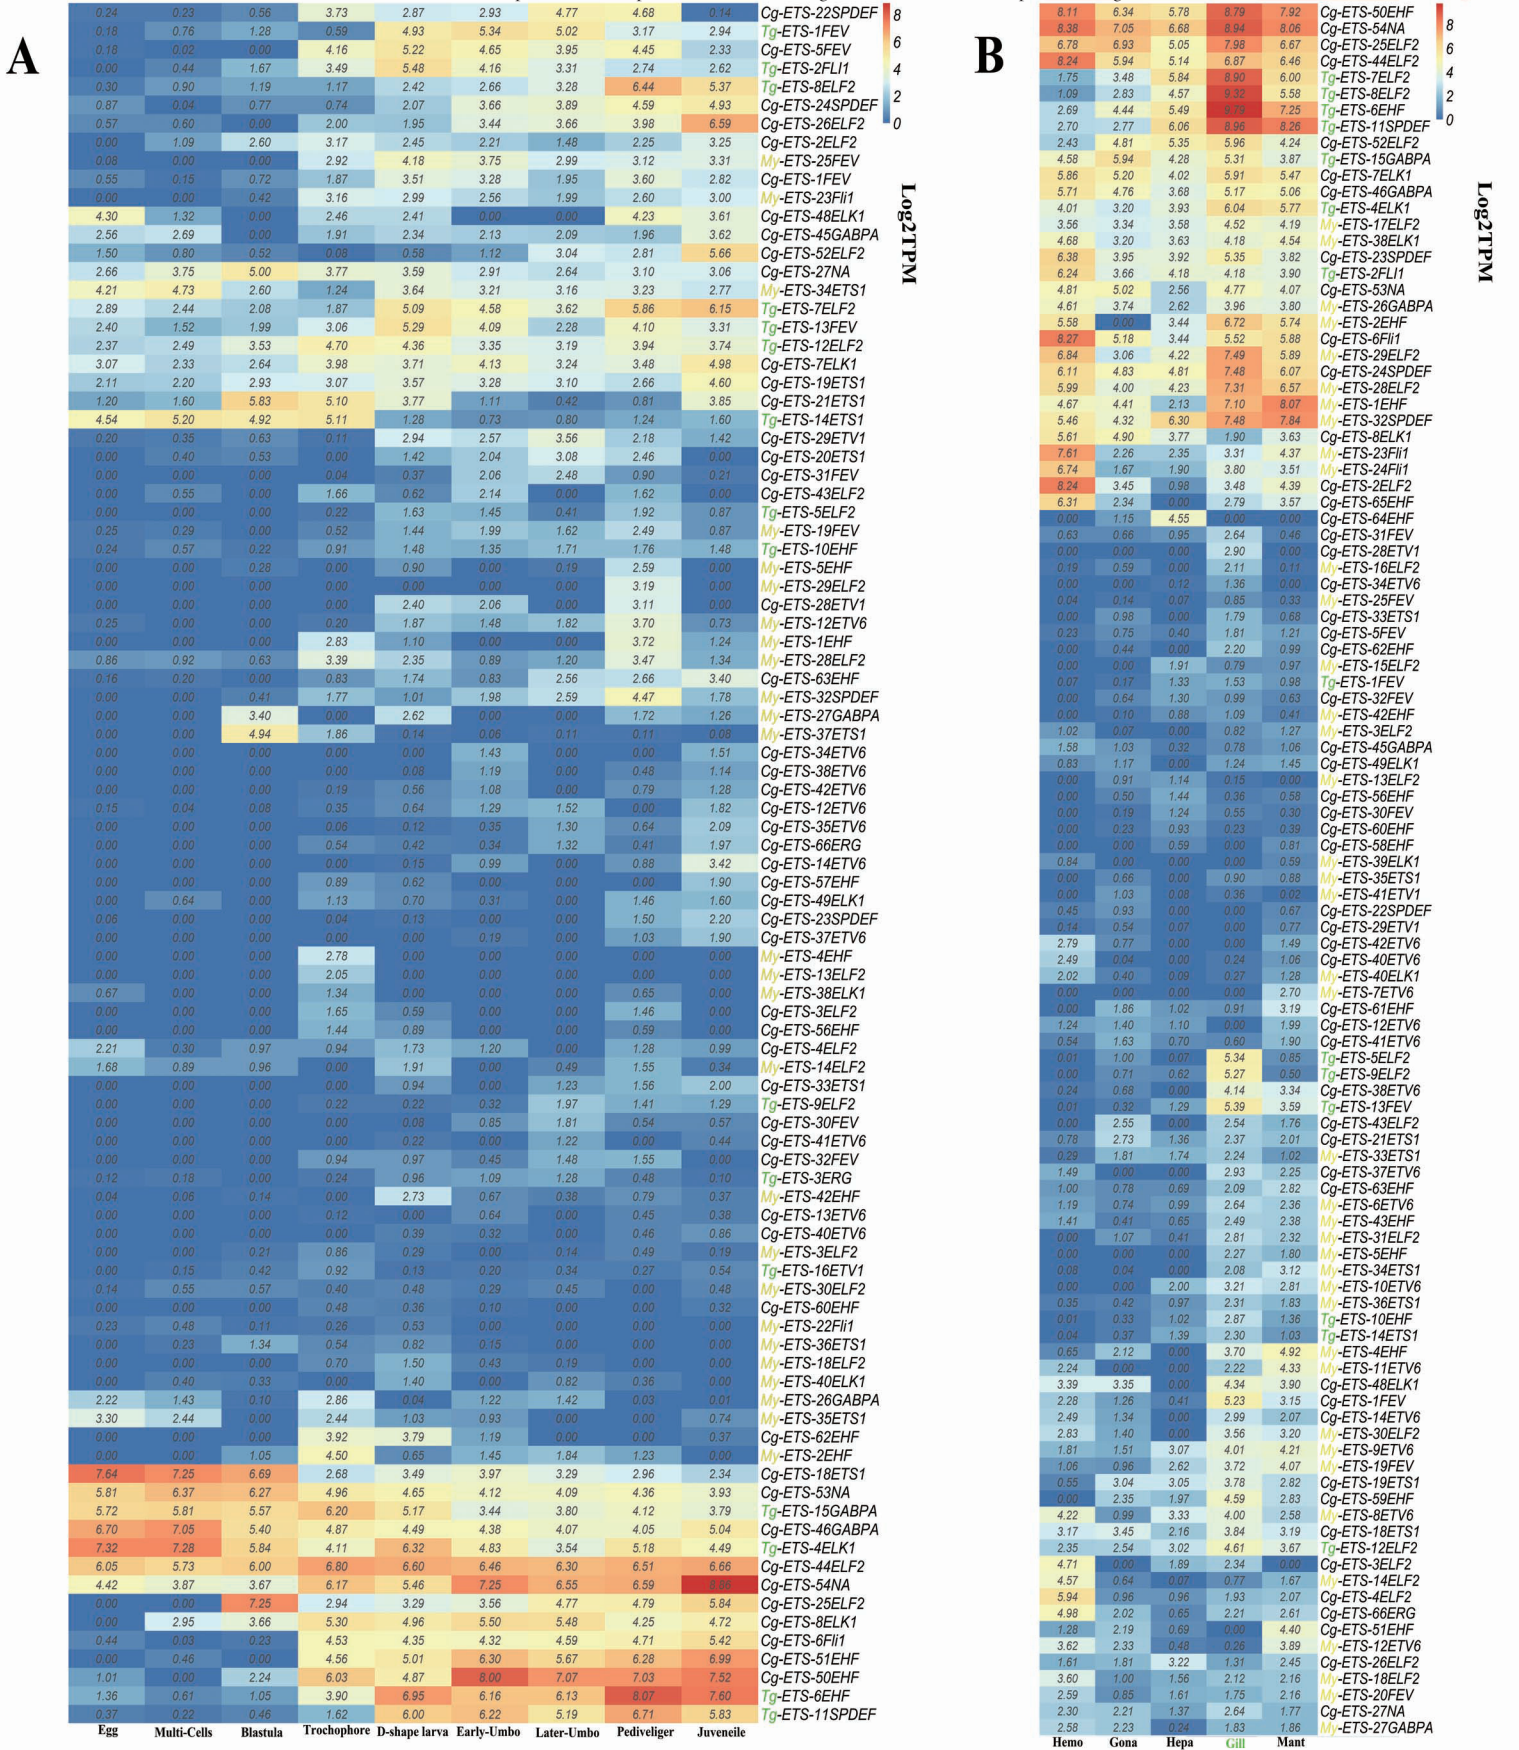

Supplement: MOESM2 [file 12864_2023_9731_MOESM2_ESM-1.pdf]
