# Supplementary material for: Genome-wide identification and characteristic analysis of ETS gene family in blood clam Tegillarca granosa
Source: BMC Genomics. 2023 Nov 21;24:700. doi: 10.1186/s12864-023-09731-5 (PMC10664356; doi:10.1186/s12864-023-09731-5)
Supplement: Supplementary file 5 — Additional file 5. Genome wide identification of ETS genes in eleven mollusks. [file 12864_2023_9731_MOESM5_ESM.xlsx]

## Sheet: Identification of  ETS genes
Additional file 5: Genome wide identification of ETS genes in eleven mollusks.
class	species	geneName	geneID	Subfamily	Type	size(aa)	pI	Instability Index	Aliphatic Index	Grand Average of Hydropathicity	cellular location	Signal Peptides
Bivalvia	Tegillarca granosa	Tg-ETS-1	Pec0131920.1	ERG	FEV	245	9.08	49.77	49.3	-0.795	Nuclear	None
		Tg-ETS-2	Pec0131930.1	ERG	FLI1	713	5.08	51.63	61.53	-0.76	Nuclear	None
		Tg-ETS-3	Pec0136170.1	ERG	ERG	425	8.37	46.46	59.55	-0.748	Nuclear	None
		Tg-ETS-4	Pec0103000.1	TCF	ELK1	355	9.52	52.29	76.3	-0.276	Nuclear	None
		Tg-ETS-5	Pec0109270.1	ESE	NA	334	9.07	35.76	61.17	-0.881	Extracellular	None
		Tg-ETS-6	Pec0109280.1	ESE	EHF	488	4.74	47.3	55.24	-0.754	Cytoplasmic	None
		Tg-ETS-7	Pec0109290.1	ESE	NA	319	5.25	34.61	66.19	-0.816	Mitochondrial	None
		Tg-ETS-8	Pec0109300.1	ELF	ELF2	302	5.09	54.52	73.79	-0.595	Plasma membrane	None
		Tg-ETS-9	Pec0109320.1	ELF	ELF2	303	5.67	36.38	73.21	-0.72	Cytoplasmic	None
		Tg-ETS-10	Pec0109490.1	ESE	EHF	514	6.22	60.7	57.74	-0.954	Nuclear	None
		Tg-ETS-11	Pec0111130.1	PDEF	SPDEF	396	5.12	52.81	74.23	-0.584	Nuclear	None
		Tg-ETS-12	Pec0187050.1	ELF	ELF2	450	4.84	57.86	71.25	-0.746	Nuclear	None
		Tg-ETS-13	Pec0194060.1	ERG	FEV	455	5.41	63.03	59.27	-0.844	Nuclear	None
		Tg-ETS-14	Pec0196440.1	ETS	ETS1	523	4.79	55	65.92	-0.753	Nuclear	None
		Tg-ETS-15	Pec0199640.1	GABP	GABPA	507	4.97	37.25	87.98	-0.507	Nuclear	None
		Tg-ETS-16	Pec0216310.1	PEA3	ETV1	595	7.34	47.58	50.35	-0.937	Nuclear	None
	Crassostrea gigas	Cg-ETS-1	XP_011416837.2	ERG	FEV	430	5.77	71.06	55.3	-0.86	Extracellular	None
		Cg-ETS-2	XP_011417409.2	ELF	ELF2	476	5.44	64.7	75.17	-0.493	Golgi	None
		Cg-ETS-3	XP_011417410.2	ELF	ELF2	428	5.6	71.32	69.72	-0.646	Nuclear	None
		Cg-ETS-4	XP_011417411.2	ELF	ELF2	414	5.5	70.89	70.68	-0.643	Golgi	None
		Cg-ETS-5	XP_011419494.1	ERG	FEV	241	9.1	48.02	39.38	-0.808	Nuclear	None
		Cg-ETS-6	XP_011420416.2	ERG	Fli1	671	5.45	49.6	55.53	-0.771	Nuclear	None
		Cg-ETS-7	XP_011421195.1	TCF	ELK1	372	9.66	56.41	73.95	-0.215	Nuclear	None
		Cg-ETS-8	XP_011421196.1	TCF	ELK1	372	9.66	56.41	73.95	-0.215	Nuclear	None
		Cg-ETS-9	XP_011423423.2	TEL	ETV6	483	8.74	63.71	68.61	-0.642	Nuclear	None
		Cg-ETS-10	XP_011423424.2	TEL	ETV6	483	8.74	63.71	68.61	-0.642	Nuclear	None
		Cg-ETS-11	XP_011423425.2	TEL	ETV6	483	8.74	63.71	68.61	-0.642	Nuclear	None
		Cg-ETS-12	XP_011423426.2	TEL	ETV6	483	8.74	63.71	68.61	-0.642	Nuclear	None
		Cg-ETS-13	XP_011423430.2	TEL	ETV6	481	8.64	63.99	68.9	-0.647	Nuclear	None
		Cg-ETS-14	XP_011423431.2	TEL	ETV6	480	8.52	63.92	69.04	-0.639	Nuclear	None
		Cg-ETS-15	XP_011423432.2	TEL	ETV6	477	8.64	64.03	67.84	-0.659	Nuclear	None
		Cg-ETS-16	XP_011423433.2	TEL	ETV6	462	8.39	61.13	68.35	-0.654	Nuclear	None
		Cg-ETS-17	XP_011423434.2	TEL	ETV6	416	8.89	61.14	68.87	-0.677	Nuclear	None
		Cg-ETS-18	XP_011436349.1	ETS	ETS1	564	5.17	61.81	67.04	-0.703	Nuclear	None
		Cg-ETS-19	XP_011436350.2	ETS	ETS1	478	5.55	57.12	62.01	-0.747	Nuclear	None
		Cg-ETS-20	XP_011436351.1	ETS	ETS1	474	4.99	55.94	68.9	-0.591	Nuclear	None
		Cg-ETS-21	XP_011436352.1	ETS	ETS1	440	5.24	57.91	63.59	-0.68	Nuclear	None
		Cg-ETS-22	XP_011443809.2	PDEF	SPDEF	449	6.13	70.46	58.84	-0.831	Nuclear	None
		Cg-ETS-23	XP_011443810.2	PDEF	SPDEF	423	5.54	62.5	63.78	-0.57	Nuclear	None
		Cg-ETS-24	XP_011443811.2	PDEF	SPDEF	401	5.58	63.48	64.84	-0.561	Nuclear	None
		Cg-ETS-25	XP_011447491.2	ELF	ELF2	376	5.87	55.27	65.82	-0.711	Nuclear	None
		Cg-ETS-26	XP_011447492.2	ELF	ELF2	376	5.87	55.27	65.82	-0.711	Nuclear	None
		Cg-ETS-27	XP_011451316.2	ESE	NA	750	6.32	62.1	62.91	-0.76	Nuclear	None
		Cg-ETS-28	XP_011454758.2	PEA3	ETV1	563	6.59	60.65	40.39	-0.998	Nuclear	None
		Cg-ETS-29	XP_011454760.2	PEA3	ETV1	562	6.59	60.89	39.95	-1.008	Nuclear	None
		Cg-ETS-30	XP_019919755.2	ERG	FEV	278	6.01	52.03	60.97	-0.873	Extracellular	None
		Cg-ETS-31	XP_019919756.2	ERG	FEV	278	6.01	52.03	60.97	-0.873	Extracellular	None
		Cg-ETS-32	XP_019919757.2	ERG	FEV	430	5.77	71.06	55.3	-0.86	Extracellular	None
		Cg-ETS-33	XP_019925424.1	ETS	ETS1	532	5.25	60.6	68.33	-0.711	Nuclear	None
		Cg-ETS-34	XP_034300679.1	TEL	ETV6	482	8.64	63.64	68.76	-0.634	Nuclear	None
		Cg-ETS-35	XP_034300690.1	TEL	ETV6	482	8.64	63.64	68.76	-0.634	Nuclear	None
		Cg-ETS-36	XP_034300712.1	TEL	ETV6	476	8.53	63.97	67.98	-0.651	Nuclear	None
		Cg-ETS-37	XP_034300715.1	TEL	ETV6	475	8.53	64.32	68.13	-0.665	Nuclear	None
		Cg-ETS-38	XP_034300721.1	TEL	ETV6	474	8.39	64.26	68.27	-0.657	Nuclear	None
		Cg-ETS-39	XP_034300727.1	TEL	ETV6	461	8.21	61.06	68.5	-0.646	Nuclear	None
		Cg-ETS-40	XP_034300735.1	TEL	ETV6	460	8.21	61.41	68.65	-0.66	Nuclear	None
		Cg-ETS-41	XP_034300740.1	TEL	ETV6	459	7.95	61.34	68.8	-0.652	Nuclear	None
		Cg-ETS-42	XP_034300750.1	TEL	ETV6	413	8.7	61.38	69.37	-0.674	Nuclear	None
		Cg-ETS-43	XP_034300885.1	ELF	ELF2	414	5.5	70.89	70.68	-0.643	Golgi	None
		Cg-ETS-44	XP_034300886.1	ELF	ELF2	414	5.5	70.89	70.68	-0.643	Golgi	None
		Cg-ETS-45	XP_034302152.1	GABP	GABPA	532	5.39	38.75	82.93	-0.596	Nuclear	None
		Cg-ETS-46	XP_034302153.1	GABP	GABPA	511	5.35	38.86	83.68	-0.61	Nuclear	None
		Cg-ETS-47	XP_034303636.1	ERG	FEV	278	6.01	52.03	60.97	-0.873	Extracellular	None
		Cg-ETS-48	XP_034307000.1	TCF	ELK1	372	9.66	56.41	73.95	-0.215	Nuclear	None
		Cg-ETS-49	XP_034307001.1	TCF	ELK1	331	9.78	55.33	76.92	-0.125	Nuclear	None
		Cg-ETS-50	XP_034310128.1	ESE	EHF	421	4.88	52.81	57.89	-0.718	Nuclear	None
		Cg-ETS-51	XP_034310136.1	ESE	EHF	415	4.81	54.74	59.64	-0.759	Nuclear	None
		Cg-ETS-52	XP_034317332.1	ELF	ELF2	298	6.43	59.44	56.61	-0.836	Cytoplasmic	None
		Cg-ETS-53	XP_034318041.1	ESE	NA	845	6.67	63.96	62.09	-0.769	Cytoplasmic	None
		Cg-ETS-54	XP_034320185.1	ESE	NA	323	5.19	43.9	63.68	-0.803	Nuclear	None
		Cg-ETS-55	XP_034320659.1	PDEF	SPDEF	202	9.16	77.22	63.22	-0.784	Nuclear	None
		Cg-ETS-56	XP_034325844.1	ESE	EHF	521	6.19	68.32	55.22	-0.823	Nuclear	None
		Cg-ETS-57	XP_034325852.1	ESE	EHF	512	6.5	70.13	51.82	-0.913	Nuclear	None
		Cg-ETS-58	XP_034325861.1	ESE	EHF	506	6.38	70.91	51.86	-0.914	Nuclear	None
		Cg-ETS-59	XP_034325870.1	ESE	EHF	506	6.38	70.91	51.86	-0.914	Nuclear	None
		Cg-ETS-60	XP_034325872.1	ESE	EHF	502	6.69	71.42	53.05	-0.874	Nuclear	None
		Cg-ETS-61	XP_034325880.1	ESE	EHF	506	6.19	70.97	54.55	-0.865	Nuclear	None
		Cg-ETS-62	XP_034325888.1	ESE	EHF	494	6.56	71.39	52.13	-0.923	Nuclear	None
		Cg-ETS-63	XP_034325897.1	ESE	EHF	468	7.01	69.53	53.38	-0.916	Nuclear	None
		Cg-ETS-64	XP_034325906.1	ESE	EHF	467	6.82	72.36	51.61	-0.948	Nuclear	None
		Cg-ETS-65	XP_034325911.1	ESE	EHF	467	6.82	72.36	51.61	-0.948	Nuclear	None
		Cg-ETS-66	XP_034335820.1	ERG	ERG	556	5.69	43.38	54.21	-0.723	Nuclear	None
	Mizuhopecten yessoensis	My-ETS-1	XP_021344979.1	ESE	EHF	406	4.83	46.31	54.31	-0.743	Nuclear	None
		My-ETS-2	XP_021344980.1	ESE	EHF	406	4.83	46.31	54.31	-0.743	Nuclear	None
		My-ETS-3	XP_021347935.1	ESE	NA	359	9.04	49.82	63.23	-0.851	Nuclear	None
		My-ETS-4	XP_021347939.1	ESE	EHF	406	4.83	46.31	54.31	-0.743	Nuclear	None
		My-ETS-5	XP_021347940.1	ESE	EHF	406	4.83	46.31	54.31	-0.743	Nuclear	None
		My-ETS-6	XP_021351395.1	TEL	ETV6	592	6.19	58	69.81	-0.683	Nuclear	None
		My-ETS-7	XP_021351396.1	TEL	ETV6	582	6.11	58.5	68.83	-0.684	Nuclear	None
		My-ETS-8	XP_021351397.1	TEL	ETV6	581	6.05	58.07	68.95	-0.684	Nuclear	None
		My-ETS-9	XP_021351398.1	TEL	ETV6	575	6.17	60.25	69.67	-0.694	Nuclear	None
		My-ETS-10	XP_021351400.1	TEL	ETV6	574	6.16	58.32	69.79	-0.678	Nuclear	None
		My-ETS-11	XP_021351401.1	TEL	ETV6	574	6.16	58.32	69.79	-0.678	Nuclear	None
		My-ETS-12	XP_021351402.1	TEL	ETV6	574	6.16	58.32	69.79	-0.678	Nuclear	None
		My-ETS-13	XP_021352364.1	ELF	ELF2	453	5.78	64.37	69.14	-0.672	Nuclear	None
		My-ETS-14	XP_021352365.1	ELF	ELF2	450	5.59	61.78	71.98	-0.628	Nuclear	None
		My-ETS-15	XP_021352366.1	ELF	ELF2	439	5.88	63.22	70.68	-0.658	Nuclear	None
		My-ETS-16	XP_021352367.1	ELF	ELF2	438	5.88	63.54	69.95	-0.668	Nuclear	None
		My-ETS-17	XP_021352368.1	ELF	ELF2	436	5.77	63.04	70.28	-0.667	Nuclear	None
		My-ETS-18	XP_021352369.1	ELF	ELF2	363	9.06	65.46	69.37	-0.744	Nuclear	None
		My-ETS-19	XP_021353499.1	ERG	FEV	498	5.8	59.65	59.96	-0.649	Nuclear	None
		My-ETS-20	XP_021353500.1	ERG	FEV	388	6.35	62.57	61.06	-0.68	Nuclear	None
		My-ETS-21	XP_021353501.1	ERG	FEV	388	6.35	62.57	61.06	-0.68	Nuclear	None
		My-ETS-22	XP_021354307.1	ERG	Fli1	318	8.66	42.97	65.85	-0.617	Nuclear	None
		My-ETS-23	XP_021358310.1	ERG	Fli1	621	5.94	48.76	63.41	-0.574	Nuclear	None
		My-ETS-24	XP_021358311.1	ERG	Fli1	607	5.71	47.83	62.62	-0.568	Nuclear	None
		My-ETS-25	XP_021358348.1	ERG	FEV	245	9.08	50.96	47.06	-0.777	Nuclear	None
		My-ETS-26	XP_021360844.1	GABP	GABPA	517	5.01	41.05	86.85	-0.497	Nuclear	None
		My-ETS-27	XP_021360845.1	GABP	GABPA	516	5.01	40.74	86.82	-0.502	Nuclear	None
		My-ETS-28	XP_021361480.1	ESE	NA	364	4.85	51.74	62.36	-0.88	Nuclear	None
		My-ETS-29	XP_021363779.1	ELF	ELF2	293	5.53	49.92	56.55	-0.844	Nuclear	None
		My-ETS-30	XP_021363787.1	ELF	ELF2	293	5.53	49.92	56.55	-0.844	Nuclear	None
		My-ETS-31	XP_021363796.1	ELF	ELF2	293	5.53	49.92	56.55	-0.844	Nuclear	None
		My-ETS-32	XP_021365446.1	PDEF	SPDEF	401	5.61	60.85	65.61	-0.697	Nuclear	None
		My-ETS-33	XP_021366637.1	ETS	ETS1	517	4.9	61.3	65.24	-0.763	Nuclear	None
		My-ETS-34	XP_021366638.1	ETS	ETS1	489	4.91	58.77	65.99	-0.761	Nuclear	None
		My-ETS-35	XP_021366639.1	ETS	ETS1	485	4.99	60.32	65.73	-0.78	Nuclear	None
		My-ETS-36	XP_021366640.1	ETS	ETS1	470	5.44	59.63	64.3	-0.773	Nuclear	None
		My-ETS-37	XP_021366641.1	ETS	ETS1	441	5.02	57.48	66.33	-0.741	Nuclear	None
		My-ETS-38	XP_021367990.1	TCF	ELK1	377	9.23	59.26	78.36	-0.178	Nuclear	None
		My-ETS-39	XP_021367998.1	TCF	ELK1	377	9.23	59.26	78.36	-0.178	Nuclear	None
		My-ETS-40	XP_021368006.1	TCF	ELK1	336	9.37	56.32	79.2	-0.147	Nuclear	None
		My-ETS-41	XP_021369537.1	PEA3	ETV1	570	6.13	56.47	47.93	-0.796	Nuclear	None
		My-ETS-42	XP_021376328.1	ESE	EHF	507	6.04	61.19	56.15	-0.883	Nuclear	None
		My-ETS-43	XP_021376329.1	ESE	EHF	505	5.95	63.5	55.6	-0.901	Nuclear	None
		My-ETS-44	XP_021376330.1	ESE	EHF	505	5.95	63.5	55.6	-0.901	Nuclear	None
	Mytilus galloprovincialis	Mg-ETS-1	VDH92314.1	GABP	NA	289	9.53	37.64	79.55	-0.653	Nuclear	None
		Mg-ETS-2	VDH93056.1	ESE	NA	316	4.45	65.02	73.39	-0.648	Membrane bound Golgi	None
		Mg-ETS-3	VDH93057.1	ESE	NA	252	4.74	61.13	75	-0.727	Cytoplasmic	None
		Mg-ETS-4	VDH93058.1	ESE	NA	253	4.7	60.38	68.58	-0.787	Nuclear	None
		Mg-ETS-5	VDH93577.1	ETS	ETS1	529	4.89	59.21	61.72	-0.804	Nuclear	None
		Mg-ETS-6	VDH93578.1	ETS	ETS1	442	5.21	54.39	62.67	-0.749	Nuclear	None
		Mg-ETS-7	VDH94512.1	PEA3	ETV1	449	7.23	60.28	43.01	-0.95	Nuclear	None
		Mg-ETS-8	VDH94513.1	PEA3	ETV1	330	7.7	61.29	44.06	-0.949	Nuclear	None
		Mg-ETS-9	VDI03279.1	NA	NA	245	9.01	43.3	59.67	-0.929	Nuclear	None
		Mg-ETS-10	VDI07119.1	ERG	FEV	381	5.02	53.65	63.2	-0.767	Nuclear	None
		Mg-ETS-11	VDI12222.1	TCF	ELK3	377	9.4	51.13	74.19	-0.327	Nuclear	None
		Mg-ETS-12	VDI12223.1	TCF	ELK3	362	9.26	51.39	73.23	-0.33	Nuclear	None
		Mg-ETS-13	VDI16335.1	ERG	FEV	381	5.02	53.31	63.96	-0.754	Nuclear	None
		Mg-ETS-14	VDI38307.1	ELF	ELF2	308	5.32	56.65	61.69	-0.809	Nuclear	None
		Mg-ETS-15	VDI38308.1	ELF	ELF2	287	5.89	51.72	57.04	-0.975	Plasma membrane	None
		Mg-ETS-16	VDI38309.1	ELF	ELF2	235	7.13	50.88	54.72	-0.987	Nuclear	None
		Mg-ETS-17	VDI40513.1	ERG	FEV	288	5.77	73.59	66.04	-0.774	Nuclear	None
		Mg-ETS-18	VDI52750.1	PDEF	SPDEF	402	5.21	74.99	67.84	-0.685	Nuclear	None
		Mg-ETS-19	VDI52751.1	PDEF	SPDEF	400	5.21	74.35	67.45	-0.695	Nuclear	None
		Mg-ETS-20	VDI55145.1	ERG	FLI1	644	5.03	59.95	53.45	-0.9	Nuclear	None
		Mg-ETS-21	VDI55146.1	ERG	Fli1	558	5.39	57.32	54.7	-0.838	Nuclear	None
		Mg-ETS-22	VDI55147.1	ERG	FEV	249	9.1	48.23	43.94	-0.865	Nuclear	None
		Mg-ETS-23	VDI57883.1	ESE	NA	542	6.25	51.85	73.15	-0.65	Membrane bound Golgi	None
		Mg-ETS-24	VDI57884.1	ESE	NA	534	5.53	54.91	75.17	-0.583	Membrane bound Golgi	None
		Mg-ETS-25	VDI57885.1	ESE	NA	536	6.25	52.17	71.06	-0.69	Plasma membrane	None
		Mg-ETS-26	VDI57886.1	ESE	NA	537	6.25	53.07	68.04	-0.713	Plasma membrane	None
		Mg-ETS-27	VDI57887.1	ESE	NA	510	6.89	51.69	68.59	-0.738	Plasma membrane	None
		Mg-ETS-28	VDI57888.1	ESE	NA	422	9.41	50.31	70.64	-0.796	Membrane bound Golgi	None
		Mg-ETS-29	VDI65838.1	TEL	ETV6	620	8.57	62.08	65.56	-0.745	Nuclear	None
		Mg-ETS-30	VDI65839.1	TEL	ETV6	619	8.57	62.02	65.67	-0.745	Nuclear	None
		Mg-ETS-31	VDI65840.1	TEL	ETV6	614	8.6	62.97	65.1	-0.765	Nuclear	None
		Mg-ETS-32	VDI65841.1	TEL	ETV6	611	8.6	62.78	64.94	-0.773	Nuclear	None
		Mg-ETS-33	VDI65842.1	TEL	ETV6	610	8.6	62.72	65.05	-0.773	Nuclear	None
		Mg-ETS-34	VDI65843.1	TEL	ETV6	507	8.52	65.89	60.57	-0.864	Nuclear	None
		Mg-ETS-35	VDI65845.1	TEL	ETV6	506	8.52	65.83	60.69	-0.864	Nuclear	None
		Mg-ETS-36	VDI65846.1	ESE	EHF	546	6.96	51.22	51.03	-0.977	Nuclear	None
		Mg-ETS-37	VDI65847.1	ESE	EHF	577	6.37	50.82	55.2	-0.903	Nuclear	None
		Mg-ETS-38	VDI65848.1	ESE	EHF	569	6.27	51.54	53.92	-0.924	Nuclear	None
		Mg-ETS-39	VDI65849.1	ESE	EHF	526	6.58	53.01	51.67	-0.955	Nuclear	None
		Mg-ETS-40	VDI74591.1	ESE	NA	229	6.36	45.02	70.13	-0.8	Nuclear	None
		Mg-ETS-41	VDI74592.1	ESE	NA	224	8.29	44.94	69.96	-0.796	Extracellular	None
		Mg-ETS-42	VDI79763.1	ESE	NA	198	6.23	67.27	62.07	-0.922	Nuclear	None
		Mg-ETS-43	VDI79764.1	ESE	NA	186	5.88	63.93	61.88	-0.901	Nuclear	None
		Mg-ETS-44	VDI79765.1	ESE	NA	206	6.71	59.38	73.35	-0.648	Membrane bound Mitochondrial	None
		Mg-ETS-45	VDI79896.1	ELF	ELF2	440	5.67	68.16	65.34	-0.825	Nuclear	None
		Mg-ETS-46	VDI79897.1	ELF	ELF2	368	8.71	64.45	63.89	-0.851	Nuclear	None
	Sinonovacula constricta	Sc-ETS-1	evm.model.ctg416.27	NA	NA	686	6.22	51.17	57.92	-0.685	Nuclear	None
		Sc-ETS-2	evm.model.ctg416.28	ERG	FEV	136	9.22	58.13	45.29	-0.791	Nuclear	None
		Sc-ETS-3	evm.model.ctg683.9	ERG	FEV	306	8.44	44.16	54.18	-0.833	Nuclear	None
		Sc-ETS-4	evm.model.ctg109.2	ESE	EHF	415	5.18	45.15	51.16	-0.895	Cytoplasmic	None
		Sc-ETS-5	evm.model.ctg206.16	ELF	ELF2	351	6.32	60.34	51.91	-0.89	Nuclear	None
		Sc-ETS-6	evm.model.ctg206.21	ESE	NA	235	6.25	41.14	52.68	-1.01	Cytoplasmic	None
		Sc-ETS-7	evm.model.ctg239.28	PDEF	SPDEF	481	5.08	39.7	75.72	-0.47	Nuclear	None
		Sc-ETS-8	evm.model.ctg226.7	GABP	GABPA	475	5.11	40.75	85.73	-0.539	Nuclear	None
		Sc-ETS-9	evm.model.ctg401.2	ERG	FEV	229	9.2	36.8	63.84	-0.812	Nuclear	None
		Sc-ETS-10	evm.model.ctg588.9	PEA3	ETV4	421	9.1	56.74	56.08	-0.74	Nuclear	None
		Sc-ETS-11	evm.model.ctg848.5	TCF	ELK1	362	9.3	49.89	71.05	-0.441	Membrane bound Golgi	None
		Sc-ETS-12	evm.model.ctg7156.1	ESE	EHF	630	4.84	51.44	62.7	-0.67	Nuclear	None
Cephalopoda	Octopus bimaculoides	Ob-ETS-1	XP_014767921.1	ESE	NA	271	6.9	47.62	59.3	-0.904	Mitochondrial	None
		Ob-ETS-2	XP_014767922.1	ESE	NA	270	7.54	47.49	58.07	-0.924	Mitochondrial	None
		Ob-ETS-3	XP_014770385.1	TEL	ETV6	603	6.29	61.12	70.8	-0.613	Nuclear	None
		Ob-ETS-4	XP_014771079.1	ESE	EHF	505	6.94	70	61.21	-1.041	Nuclear	None
		Ob-ETS-5	XP_014773534.1	ELF	ELF2	213	9.13	56.02	62.25	-0.814	Nuclear	None
		Ob-ETS-6	XP_014780443.1	ERG	FEV	361	6.88	42.13	50.5	-0.798	Extracellular	None
		Ob-ETS-7	XP_014780456.1	ERG	FEV	537	6	71.13	56.29	-0.823	Nuclear	None
		Ob-ETS-8	XP_014780457.1	ERG	FEV	490	6.28	73.65	54.73	-0.83	Nuclear	None
		Ob-ETS-9	XP_014783312.1	ETS	ETS1	430	5.86	43.68	62.84	-0.863	Nuclear	None
		Ob-ETS-10	XP_014783313.1	ETS	ETS1	402	5.98	44.23	64.05	-0.831	Nuclear	None
		Ob-ETS-11	XP_014783314.1	ETS	ETS1	359	6.27	40.49	63.04	-0.833	Nuclear	None
		Ob-ETS-12	XP_014786759.1	GABP	GABPA	457	6.09	41.42	93.37	-0.502	Nuclear	None
		Ob-ETS-13	XP_014787563.1	ESE	NA	129	9.24	46.53	65.81	-0.497	Membrane bound Mitochondrial	None
		Ob-ETS-14	XP_014787929.1	ERF	ERF	402	4.84	54.29	68.88	-0.767	Nuclear	None
		Ob-ETS-15	XP_014790762.1	PDEF	NA	247	8.16	61.34	63.56	-0.763	Nuclear	None
	Octopus sinensis	Os-ETS-1	XP_029636068.1	ERG	FEV	376	6.41	38.98	48.24	-0.864	Extracellular	None
		Os-ETS-2	XP_029636101.1	ERG	FEV	536	5.96	73.69	55.49	-0.825	Nuclear	None
		Os-ETS-3	XP_029636140.1	GABP	GABPA	465	6.34	42.18	93.03	-0.496	Nuclear	None
		Os-ETS-4	XP_029636141.1	GABP	GABPA	465	6.34	42.18	93.03	-0.496	Nuclear	None
		Os-ETS-5	XP_029636561.1	ETS	ETS1	508	5.99	50.34	60.87	-0.845	Nuclear	None
		Os-ETS-6	XP_029636562.1	ETS	ETS1	475	6.25	48.08	60.99	-0.862	Nuclear	None
		Os-ETS-7	XP_029636563.1	ETS	ETS1	463	5.63	47.43	61.73	-0.85	Nuclear	None
		Os-ETS-8	XP_029636564.1	ETS	ETS1	447	6.51	48.85	61.97	-0.834	Nuclear	None
		Os-ETS-9	XP_029636565.1	ETS	ETS1	408	6.31	51.36	58.11	-0.906	Nuclear	None
		Os-ETS-10	XP_029637120.1	ESE	NA	271	6.9	46.42	59.67	-0.872	Mitochondrial	None
		Os-ETS-11	XP_029639025.1	ESE	EHF	415	5.67	43.13	61.81	-0.805	Nuclear	None
		Os-ETS-12	XP_029639064.1	ESE	EHF	476	7.75	66.07	61.05	-1.078	Nuclear	None
		Os-ETS-13	XP_029639090.1	ERF	ETV3L	179	5.76	45.81	64.86	-0.835	Membrane bound Extracellular	None
		Os-ETS-14	XP_029639157.1	TEL	ETV6	598	6.22	62.44	70.55	-0.595	Nuclear	None
		Os-ETS-15	XP_029639499.1	ESE	EHF	210	9.67	48.03	67.33	-0.7	Membrane bound Mitochondrial	None
		Os-ETS-16	XP_029639583.1	ELF	ELF2	344	5.65	52.06	67.97	-0.598	Nuclear	None
		Os-ETS-17	XP_029650572.1	TCF	ELK3	502	9.56	65.65	71.89	-0.47	Membrane bound Golgi	None
		Os-ETS-18	XP_029654503.1	ERF	ERF	1141	9.37	39.59	88.49	-0.41	Nuclear	None
		Os-ETS-19	XP_029654840.1	ERF	ERF	110	5.89	44.56	48.73	-1.066	Extracellular	None
		Os-ETS-20	XP_029655685.2	ERG	FEV	198	9.07	35.93	62.68	-0.517	Nuclear	None
		Os-ETS-21	XP_029656714.1	PDEF	SPDEF	378	5.08	60.88	70.95	-0.736	Nuclear	None
		Os-ETS-22	XP_029656784.1	ERF	ERF	173	5.06	70.11	58.03	-0.863	Extracellular	None
		Os-ETS-23	XP_036358655.1	ESE	NA	288	6.99	44.23	67.29	-0.734	Extracellular	None
		Os-ETS-24	XP_036358656.1	ESE	NA	287	7.53	44.09	66.17	-0.752	Extracellular	None
		Os-ETS-25	XP_036359062.1	ETS	ETS1	480	6.14	51.54	61.77	-0.827	Nuclear	None
		Os-ETS-26	XP_036359063.1	ETS	ETS1	441	6.02	53.72	58.19	-0.883	Nuclear	None
		Os-ETS-27	XP_036359064.1	ETS	ETS1	437	6.47	47.79	61.6	-0.812	Nuclear	None
		Os-ETS-28	XP_036359065.1	ETS	ETS1	413	6.19	55.34	59.06	-0.864	Nuclear	None
		Os-ETS-29	XP_036360357.1	ELF	ELF2	343	5.88	51.75	67.32	-0.613	Nuclear	None
		Os-ETS-30	XP_036360358.1	ELF	ELF2	318	6.01	48.08	69.53	-0.578	Nuclear	None
		Os-ETS-31	XP_036360379.1	ERF	ETV3L	175	6.07	45.86	68	-0.886	Nuclear	None
		Os-ETS-32	XP_036360404.1	TEL	ETV6	598	6.22	62.44	70.55	-0.595	Nuclear	None
		Os-ETS-33	XP_036360405.1	TEL	ETV6	598	6.22	62.44	70.55	-0.595	Nuclear	None
		Os-ETS-34	XP_036368842.1	TCF	ELK3	487	9.56	62.84	72.51	-0.482	Membrane bound Golgi	None
		Os-ETS-35	XP_036368843.1	TCF	ELK3	478	9.65	67.65	72.45	-0.432	Nuclear	None
	Sepia pharaonis	Sp-ETS-1	CAE1143490.1	TCF	ELK3	494	9.3	62.93	77.33	-0.36	Nuclear	None
		Sp-ETS-2	CAE1160388.1	ESE	NA	430	10.91	55.54	79.21	1.154	Plasma membrane	None
		Sp-ETS-3	CAE1235152.1	ERG	FEV	191	9.06	24.2	58.32	-0.528	Nuclear	None
		Sp-ETS-4	CAE1238181.1	PDEF	SPDEF	290	6.55	64.64	72	-0.721	Nuclear	None
		Sp-ETS-5	CAE1238184.1	PDEF	SPDEF	414	8.46	56.88	71.62	-0.679	Nuclear	None
		Sp-ETS-6	CAE1238187.1	PDEF	SPDEF	359	6.37	54.1	75.26	-0.655	Nuclear	None
		Sp-ETS-7	CAE1238190.1	PDEF	SPDEF	358	6.56	54.02	75.47	-0.655	Nuclear	None
		Sp-ETS-8	CAE1243261.1	ESE	EHF	304	9.5	50.59	68.29	-0.726	Membrane bound Mitochondrial	None
		Sp-ETS-9	CAE1250942.1	TEL	ETV7	361	6.64	48.56	60.55	-0.839	Nuclear	None
		Sp-ETS-10	CAE1265005.1	GABP	GABPA	483	6.01	43.93	90.56	-0.507	Nuclear	None
		Sp-ETS-11	CAE1266812.1	ETS	ETS1	418	5.66	44.89	65.12	-0.746	Nuclear	None
		Sp-ETS-12	CAE1266813.1	ETS	ETS1	452	5.4	48.4	64.76	-0.745	Nuclear	None
		Sp-ETS-13	CAE1274175.1	NA	NA	282	9.02	44.56	85.46	-0.228	Nuclear	None
		Sp-ETS-14	CAE1276997.1	ELF	ELF2	1068	8.97	60.14	97.94	0.858	Membrane bound Endoplasmic reticulum	None
		Sp-ETS-15	CAE1322439.1	PEA3	ETV1	363	5.96	56.09	60.44	-0.713	Nuclear	None
		Sp-ETS-16	CAE1329917.1	ESE	EHF	446	7.21	50.07	60.76	-0.776	Nuclear	None
		Sp-ETS-17	CAE1329918.1	ESE	EHF	431	7.61	47.31	62.2	-0.774	Nuclear	None
gastropoda	Aplysia californica	Ac-ETS-1	XP_005102874.2	NA	NA	1043	6.02	49.9	62.11	-0.585	Nuclear	None
		Ac-ETS-2	XP_005103501.1	GABP	GABPA	502	5.67	49.83	88.9	-0.449	Nuclear	None
		Ac-ETS-3	XP_005103502.1	GABP	GABPA	502	5.67	49.83	88.9	-0.449	Nuclear	None
		Ac-ETS-4	XP_005103975.2	TCF	ELK1	263	9.39	41.36	71.63	-0.881	Nuclear	None
		Ac-ETS-5	XP_005105078.1	ERG	FEV	238	8.98	51.95	50.55	-0.937	Nuclear	None
		Ac-ETS-6	XP_005105079.1	ERG	FEV	214	8.81	50.77	50.28	-0.936	Nuclear	None
		Ac-ETS-7	XP_005105082.3	NA	NA	1061	6.1	48.9	62.62	-0.584	Nuclear	None
		Ac-ETS-8	XP_005105487.2	ELF	ELF2	1115	8.5	69.23	62.22	-0.559	Nuclear	None
		Ac-ETS-9	XP_005109350.1	ESE	NA	554	4.86	60.45	55.94	-0.846	Nuclear	None
		Ac-ETS-10	XP_005110715.1	PDEF	SPDEF	579	5.28	61.28	65.96	-0.485	Nuclear	None
		Ac-ETS-11	XP_005110716.1	PDEF	SPDEF	577	5.28	61.46	65.68	-0.492	Nuclear	None
		Ac-ETS-12	XP_012936605.1	TEL	NA	646	6.41	67.41	55.57	-0.84	Nuclear	None
		Ac-ETS-13	XP_012943555.1	ERG	FEV	331	7.48	63.4	55.53	-0.769	Nuclear	None
		Ac-ETS-14	XP_012944484.1	ESE	NA	272	9.6	74.66	43.79	-0.701	Membrane bound Extracellular	None
		Ac-ETS-15	XP_012944791.1	ELF	ELF2	509	4.89	68.24	56.54	-0.893	Nuclear	None
		Ac-ETS-16	XP_012944794.1	ELF	ELF2	509	4.89	68.24	56.54	-0.893	Nuclear	None
		Ac-ETS-17	XP_012946448.2	ERG	FEV	895	5.65	65.35	54.18	-0.695	Nuclear	None
		Ac-ETS-18	XP_012946644.1	ETS	ETS1	275	5.88	50.96	53.24	-0.767	Nuclear	None
		Ac-ETS-19	XP_035825263.1	ESE	EHF	783	6.53	61.43	47.57	-0.929	Nuclear	None
		Ac-ETS-20	XP_035826976.1	GABP	GABPA	499	5.6	49.82	88.86	-0.444	Nuclear	None
		Ac-ETS-21	XP_035827129.1	PEA3	ETV4	201	9.26	51.66	46.22	-0.635	Nuclear	None
	Biomphalaria glabrata	Bg-ETS-1	XP_013062408.1	ESE	NA	468	5.62	71.08	53.53	-0.892	Nuclear	None
		Bg-ETS-2	XP_013064653.1	ELF	ELF2	471	4.7	53.29	64.37	-0.755	Nuclear	None
		Bg-ETS-3	XP_013066871.1	ERG	FEV	472	7.74	58.81	59.11	-0.865	Nuclear	None
		Bg-ETS-4	XP_013071331.1	NA	NA	310	7.85	35.55	65.58	-0.451	Nuclear	None
		Bg-ETS-5	XP_013071434.1	ETS	ETS1	556	6.38	54.53	56.65	-0.877	Nuclear	None
		Bg-ETS-6	XP_013075300.1	TCF	ELK3	647	9.81	63.76	60.65	-0.773	Nuclear	None
		Bg-ETS-7	XP_013075301.1	TCF	ELK3	647	9.81	63.76	60.65	-0.773	Nuclear	None
		Bg-ETS-8	XP_013075302.1	TCF	ELK3	573	9.79	63.31	61.15	-0.763	Nuclear	None
		Bg-ETS-9	XP_013075303.1	TCF	ELK3	573	9.79	63.31	61.15	-0.763	Nuclear	None
		Bg-ETS-10	XP_013075304.1	TCF	ELK3	573	9.79	63.31	61.15	-0.763	Nuclear	None
		Bg-ETS-11	XP_013075305.1	TCF	ELK3	573	9.79	63.31	61.15	-0.763	Nuclear	None
		Bg-ETS-12	XP_013075306.1	TCF	ELK3	573	9.79	63.31	61.15	-0.763	Nuclear	None
		Bg-ETS-13	XP_013075307.1	TCF	ELK3	573	9.79	63.31	61.15	-0.763	Nuclear	None
		Bg-ETS-14	XP_013075308.1	TCF	ELK3	573	9.75	62.67	62.16	-0.76	Nuclear	None
		Bg-ETS-15	XP_013082944.1	ERG	FEV	310	7.48	52.98	54.81	-0.713	Nuclear	None
		Bg-ETS-16	XP_013084760.1	ESE	EHF	570	5.89	55.25	51.33	-0.78	Nuclear	None
		Bg-ETS-17	XP_013090811.1	TEL	ETV6	686	6.76	64.54	69.74	-0.611	Nuclear	None
		Bg-ETS-18	XP_013090812.1	TEL	ETV6	633	6.3	64.88	65.59	-0.708	Nuclear	None
		Bg-ETS-19	XP_013090813.1	TEL	ETV6	541	6.27	67.52	65.58	-0.782	Nuclear	None
		Bg-ETS-20	XP_013092977.1	PDEF	SPDEF	450	5.65	64.68	64.76	-0.629	Nuclear	None
		Bg-ETS-21	XP_013092988.1	PDEF	SPDEF	385	6.47	55.7	68.36	-0.646	Nuclear	None
		Bg-ETS-22	XP_013095978.1	ERG	FEV	191	7.89	45.83	56.81	-0.759	Nuclear	Yes
	Lottia gigantea	Lg-ETS-1	XP_009046893.1	ESE	ELF5	212	9.49	58.88	61.65	-0.9	Nuclear	None
		Lg-ETS-2	XP_009046895.1	ELF	ELF2	278	4.8	53.26	63.81	-0.853	Cytoplasmic	None
		Lg-ETS-3	XP_009048364.1	PDEF	NA	116	10.32	55.74	71.38	-0.796	Nuclear	None
		Lg-ETS-4	XP_009051420.1	TEL	NA	81	9.9	30.49	92.59	-0.525	Nuclear	None
		Lg-ETS-5	XP_009052917.1	PEA3	ETV1	204	8.92	47.06	55	-0.798	Nuclear	None
		Lg-ETS-6	XP_009055486.1	ELF	NA	98	9.36	22.41	84.49	-0.497	Nuclear	None
		Lg-ETS-7	XP_009057440.1	ESE	NA	91	10.09	39.46	63.19	-0.874	Nuclear	None
		Lg-ETS-8	XP_009057441.1	ESE	NA	98	9.85	25.62	59.69	-0.67	Nuclear	None
		Lg-ETS-9	XP_009065941.1	GABP	GABPA	459	5.79	50.1	86.78	-0.539	Nuclear	None
		Lg-ETS-10	XP_009066897.1	ESE	NA	73	10.28	27.27	64.11	-0.899	Nuclear	None
