# Supplementary material for: Genome-wide identification and characteristic analysis of ETS gene family in blood clam Tegillarca granosa
Source: BMC Genomics. 2023 Nov 21;24:700. doi: 10.1186/s12864-023-09731-5 (PMC10664356; doi:10.1186/s12864-023-09731-5)
Supplement: Supplementary file 7 — Additional file 7. Expressions of ETS genes in different developmental stages and adult tissues. [file 12864_2023_9731_MOESM7_ESM.xlsx]

## Sheet:  Expression of ETS genes
Additional file 7: Expressions of ETS genes in different developmental stages and adult tissues.
species	geneName	geneID	Hemo	Gona	Hepa	Gill	Mant	Egg	Multi-Cells	Blastula	Trochophore	D-shape Larva	Early-Umbo	Later-Umbo	Pediveliger	Juveneile
Tegillarca granosa	Tg-ETS-1	Pec0131920.1	0.05	0.123333	1.51333	1.88	0.973333	0.13	0.69	1.435	0.5025	29.551	39.545	31.48	7.9975	6.695
	Tg-ETS-2	Pec0131930.1	74.6833	11.6633	17.09	17.0867	13.9267	0	0.36	2.18	10.255	43.57	16.84	8.94	5.7025	5.13
	Tg-ETS-3	Pec0136170.1	0	0.326667	0	0	0	0.085	0.135	0	0.185	0.941	1.13	1.435	0.3975	0.075
	Tg-ETS-4	Pec0103000.1	15.1067	8.21667	14.2167	64.7533	53.6033	158.29	154.472	56.415	16.26	79.139	27.37	10.615	35.1875	21.43
	Tg-ETS-5	Pec0109270.1	0.01	0.993333	0.05	39.4367	0.806667	0	0	0	0.1625	2.103	1.74	0.325	2.7925	0.83
	Tg-ETS-6	Pec0109280.1	5.46333	20.65	43.95	881.473	151.077	1.575	0.528333	1.065	13.9775	122.362	70.655	68.865	267.345	193.245
	Tg-ETS-7	Pec0109290.1	2.37333	10.1933	56.2767	475.317	63.06	6.43	4.42833	3.225	2.6625	32.964	22.895	11.32	57.2325	69.83
	Tg-ETS-8	Pec0109300.1	1.13333	6.1	22.7	639.73	46.6767	0.23	0.861667	1.285	1.245	4.348	5.34	8.71	85.58	40.315
	Tg-ETS-9	Pec0109320.1	0	0.64	0.533333	37.57	0.41	0	0	0	0.1625	0.168	0.25	2.915	1.6625	1.44
	Tg-ETS-10	Pec0109490.1	0.01	0.253333	1.03	6.30667	1.57	0.18	0.488333	0.165	0.885	1.787	1.555	2.27	2.3875	1.795
	Tg-ETS-11	Pec0111130.1	5.48333	5.83333	65.6233	495.533	304.97	0.29	0.166667	0.375	2.0675	63.019	73.42	35.39	103.362	55.85
	Tg-ETS-12	Pec0187050.1	4.11	4.80667	7.1	23.49	11.77	4.185	4.62333	10.52	25.0475	19.588	9.165	8.1	14.3525	12.345
	Tg-ETS-13	Pec0194060.1	0.01	0.25	1.44667	40.8033	11.02	4.295	1.86	2.98	7.3675	38.021	16.04	3.84	16.125	8.94
	Tg-ETS-14	Pec0196440.1	0.0266667	0.293333	1.61333	3.91667	1.04333	22.265	35.7733	29.29	33.6425	1.436	0.66	0.74	1.365	2.025
	Tg-ETS-15	Pec0199640.1	22.9933	60.4033	18.43	38.6667	13.5733	51.88	54.9967	46.605	72.45	35.075	9.845	12.945	16.34	12.815
	Tg-ETS-16	Pec0216310.1	0	0.113333	0.106667	0.47	0.1	0	0.111667	0.335	0.89	0.091	0.145	0.265	0.205	0.455
Crassostrea gigas	Cg-ETS-1	XP_011416837.2	3.86	1.4	0.33	36.48	7.89	0.46	0.1075	0.65	2.646	10.3929	8.705	2.86	11.115	6.06
	Cg-ETS-2	XP_011417409.2	302.06	9.895	0.97	10.16	19.935	0	1.1325	5.08	7.99	4.47714	3.62	1.79	3.77	8.49
	Cg-ETS-3	XP_011417410.2	25.09	0	2.71	4.07	0	0	0	0	2.134	0.51	0	0	1.745	0
	Cg-ETS-4	XP_011417411.2	60.31	0.94	0.94	2.81	3.195	3.62	0.2275	0.96	0.918	2.32714	1.29	0	1.435	0.98
	Cg-ETS-5	XP_011419494.1	0.17	0.685	0.32	2.5	1.32	0.13	0.0125	0	16.918	36.29	24.165	14.45	20.91	4.02
	Cg-ETS-6	XP_011420416.2	308.69	35.225	9.85	44.74	57.925	0.36	0.02	0.17	22.112	19.3229	18.935	23.15	25.16	41.91
	Cg-ETS-7	XP_011421195.1	57.13	35.79	15.19	59.19	43.425	7.42	4.0375	5.22	14.816	12.0443	16.465	8.48	10.145	30.48
	Cg-ETS-8	XP_011421196.1	47.7	28.86	12.68	2.74	11.36	0	6.735	11.65	38.458	30.1329	44.395	43.69	17.995	25.32
	Cg-ETS-9	XP_011423423.2	0	0	0	0	0	0	0	0	0	0	0	0	0	0
	Cg-ETS-10	XP_011423424.2	0	0	0	0	0	0	0	0	0	0	0	0	0	0
	Cg-ETS-11	XP_011423425.2	0	0	0	0	0.37	0	0	0	0.096	0	0	0	0.65	0
	Cg-ETS-12	XP_011423426.2	1.36	1.64	1.15	0	2.96	0.11	0.0275	0.06	0.272	0.555714	1.445	1.87	0	2.53
	Cg-ETS-13	XP_011423430.2	0.33	0	0	0.01	0.01	0	0	0	0.084	0	0.555	0	0.37	0.3
	Cg-ETS-14	XP_011423431.2	4.6	1.53	0	6.93	3.21	0	0	0	0	0.107143	0.985	0	0.845	9.74
	Cg-ETS-15	XP_011423432.2	0	0	0	0	0	0	0	0	0	0	0	0	0	0
	Cg-ETS-16	XP_011423433.2	0	0	0	0	0	0	0	0	0	0	0	0	0	0
	Cg-ETS-17	XP_011423434.2	0	0	0	0	0	0	0	0	0	0	0	0	0	0
	Cg-ETS-18	XP_011436349.1	7.97	9.895	3.47	13.37	8.11	198.39	151.48	101.98	5.4	10.2143	14.67	8.81	6.79	4.06
	Cg-ETS-19	XP_011436350.2	0.46	7.245	7.26	12.74	6.08	3.32	3.5925	6.63	7.41	10.8586	8.72	7.55	5.315	23.33
	Cg-ETS-20	XP_011436351.1	0	0	0	0.23	0.1	0	0.3225	0.44	0	1.67714	3.125	7.46	4.495	0
	Cg-ETS-21	XP_011436352.1	0.72	5.645	1.57	4.18	3.02	1.29	2.0375	55.92	33.3	12.6743	1.16	0.34	0.755	13.47
	Cg-ETS-22	XP_011443809.2	0.37	0.91	0	0	0.59	0.18	0.17	0.47	12.28	6.30143	6.645	26.31	24.72	0.1
	Cg-ETS-23	XP_011443810.2	82.04	14.405	14.12	39.88	13.09	0.04	0	0	0.028	0.0914286	0	0	1.825	3.6
	Cg-ETS-24	XP_011443811.2	67.95	27.445	27.06	177.09	66.12	0.83	0.03	0.7	0.674	3.19857	11.635	13.87	23.155	29.48
	Cg-ETS-25	XP_011447491.2	109.11	121.155	32.08	252.02	100.755	0	0	151.33	6.672	8.74857	10.835	26.29	26.65	56.46
	Cg-ETS-26	XP_011447492.2	2.05	2.515	8.29	1.48	4.48	0.48	0.515	0	3	2.85286	9.83	11.6	14.775	95.52
	Cg-ETS-27	XP_011451316.2	3.91	3.62	1.58	5.25	2.4	5.34	12.5	30.96	12.606	11.0829	6.515	5.24	7.575	7.32
	Cg-ETS-28	XP_011454758.2	0	0	0	6.46	0	0	0	0	0	4.26857	3.16	0	7.645	0
	Cg-ETS-29	XP_011454760.2	0.1	0.455	0.05	0	0.705	0.15	0.2725	0.55	0.08	6.69	4.945	10.8	3.535	1.67
	Cg-ETS-30	XP_019919755.2	0	0.14	1.37	0.46	0.23	0	0	0	0	0.0585714	0.805	2.51	0.455	0.48
	Cg-ETS-31	XP_019919756.2	0.55	0.575	0.93	5.24	0.375	0	0	0	0.028	0.291429	3.18	4.58	0.865	0.16
	Cg-ETS-32	XP_019919757.2	0	0.555	1.47	0.98	0.545	0	0	0	0.92	0.952857	0.37	1.79	1.925	0
	Cg-ETS-33	XP_019925424.1	0	0.97	0	2.47	0.6	0	0	0	0	0.924286	0	1.34	1.945	2.99
	Cg-ETS-34	XP_034300679.1	0	0	0.09	1.57	0	0	0	0	0	0	1.695	0	0	1.84
	Cg-ETS-35	XP_034300690.1	0	0	0	0	0.345	0	0	0	0.042	0.09	0.275	1.47	0.555	3.25
	Cg-ETS-36	XP_034300712.1	0	0	0	0	0	0	0	0	0	0.177143	0.175	0	0.41	0
	Cg-ETS-37	XP_034300715.1	1.81	0	0	6.63	3.75	0	0	0	0	0	0.14	0	1.035	2.72
	Cg-ETS-38	XP_034300721.1	0.18	0.6	0	16.68	9.15	0	0	0	0	0.0571429	1.275	0	0.39	1.21
	Cg-ETS-39	XP_034300727.1	0	0	0	0	0	0	0	0	0	0.00142857	0.315	0	0	0
	Cg-ETS-40	XP_034300735.1	4.63	0.03	0	0.18	1.08	0	0	0	0	0.31	0.25	0	0.375	0.81
	Cg-ETS-41	XP_034300740.1	0.45	2.09	0.62	0.52	2.73	0	0	0	0	0.164286	0	1.33	0	0.36
	Cg-ETS-42	XP_034300750.1	5.9	0.7	0	0	1.81	0	0	0	0.142	0.472857	1.11	0	0.73	1.42
	Cg-ETS-43	XP_034300885.1	0	4.855	0	4.83	2.39	0	0.465	0	2.166	0.537143	3.415	0	2.075	0
	Cg-ETS-44	XP_034300886.1	301.1	60.28	34.2	115.79	86.755	65.14	52.1275	63.16	110.266	96.0486	87.175	77.78	90.235	99.81
	Cg-ETS-45	XP_034302152.1	1.99	1.035	0.25	0.72	1.09	4.89	5.455	0	2.77	4.05143	3.39	3.26	2.885	11.28
	Cg-ETS-46	XP_034302153.1	51.29	26.085	11.79	35.04	32.26	103.08	131.097	41.28	28.3	21.4757	19.76	15.74	15.585	31.96
	Cg-ETS-47	XP_034303636.1	0	0	0	0	0	0	0	0	0	0	0	0	0.48	0
	Cg-ETS-48	XP_034307000.1	9.48	9.205	0	19.29	13.92	18.69	1.495	0	4.504	4.32143	0	0	17.705	11.22
	Cg-ETS-49	XP_034307001.1	0.78	1.255	0	1.36	1.725	0	0.5625	0	1.188	0.622857	0.24	0	1.75	2.03
	Cg-ETS-50	XP_034310128.1	274.6	79.745	53.79	441.58	241.05	1.02	0	3.72	64.374	28.1729	255.7	133.42	129.52	182.4
	Cg-ETS-51	XP_034310136.1	1.43	3.565	0.61	0	20.135	0	0.375	0	22.574	31.2971	77.655	49.84	76.74	125.92
	Cg-ETS-52	XP_034317332.1	4.39	27.105	39.85	61.42	17.86	1.83	0.74	0.43	0.056	0.49	1.17	7.25	5.99	49.43
	Cg-ETS-53	XP_034318041.1	27.12	31.485	4.89	26.31	15.815	55.06	81.985	76.4	30.1	24.0843	16.34	16.05	19.59	14.23
	Cg-ETS-54	XP_034320185.1	332.58	131.56	101.54	491.82	265.36	20.43	13.67	11.75	70.96	42.9771	151.105	92.68	95.365	464.66
	Cg-ETS-55	XP_034320659.1	0	0	0.64	0	0	0	0	0	0.024	0.115714	0	0	0	0
	Cg-ETS-56	XP_034325844.1	0	0.41	1.71	0.28	0.5	0	0	0	1.712	0.854286	0	0	0.51	0
	Cg-ETS-57	XP_034325852.1	0	0	0	0	0	0	0	0	0.858	0.534286	0	0	0	2.73
	Cg-ETS-58	XP_034325861.1	0	0	0.51	0	0.755	0	0	0	0	0	0	0	0	0
	Cg-ETS-59	XP_034325870.1	0	4.115	2.91	23.11	6.115	0	0	0	0	0	0	0	0	0
	Cg-ETS-60	XP_034325872.1	0	0.175	0.9	0.17	0.31	0	0	0	0.396	0.282857	0.075	0	0	0.25
	Cg-ETS-61	XP_034325880.1	0	2.62	1.03	0.88	8.14	0	0	0	0	0	0	0	0	0
	Cg-ETS-62	XP_034325888.1	0	0.355	0	3.61	0.98	0	0	0	14.15	12.8729	1.275	0	0	0.29
	Cg-ETS-63	XP_034325897.1	1	0.715	0.61	3.27	6.045	0.12	0.15	0	0.778	2.34286	0.78	4.9	5.3	9.54
	Cg-ETS-64	XP_034325906.1	0	1.22	22.46	0	0	0	0	0	0	0	0	0	0	0
	Cg-ETS-65	XP_034325911.1	78.43	4.05	0	5.93	10.875	0	0	0	0	0	0	0	0	0
	Cg-ETS-66	XP_034335820.1	30.48	3.055	0.57	3.64	5.1	0	0	0	0.456	0.34	0.265	1.5	0.325	2.93
Mizuhopecten yessoensis	My-ETS-1	XP_021344979.1	24.375	20.255	3.37	136.127	267.557	0	0	0	6.09	1.14	0	0	12.21	1.37
	My-ETS-2	XP_021344980.1	46.84	0	9.85667	104.577	52.43	0	0	1.07	21.62	0.57	1.73	2.58	1.35	0
	My-ETS-3	XP_021347935.1	1.025	0.0525	0	0.763333	1.40667	0	0	0.16	0.82	0.22	0	0.1	0.4	0.14
	My-ETS-4	XP_021347939.1	0.57	3.3575	0	11.9767	29.23	0	0	0	5.86	0	0	0	0	0
	My-ETS-5	XP_021347940.1	0	0	0	3.82667	2.47333	0	0	0.21	0	0.86	0	0.14	5.02	0
	My-ETS-6	XP_021351395.1	1.285	0.665	0.983333	5.25333	4.13667	0	0	0	0	0	0	0	0	0
	My-ETS-7	XP_021351396.1	0	0	0	0	5.49667	0	0	0	0	0	0	0	0	0
	My-ETS-8	XP_021351397.1	17.675	0.99	9.05	14.95	4.97333	0	0.12	0.05	0	0	0	0	0	0
	My-ETS-9	XP_021351398.1	2.495	1.8575	7.41	15.1467	17.5	0	0	0	0	0	0	0	0	0
	My-ETS-10	XP_021351400.1	0	0	3.00667	8.23	6.01333	0	0	0	0	0	0	0	0	0
	My-ETS-11	XP_021351401.1	3.71	0	0	3.67333	19.0467	0	0	0	0	0	0	0	0	0
	My-ETS-12	XP_021351402.1	11.3	4.02	0.396667	0.2	13.8467	0.19	0	0	0.15	2.65	1.79	2.54	11.98	0.66
	My-ETS-13	XP_021352364.1	0	0.875	1.2	0.106667	0	0	0	0	3.14	0	0	0	0	0
	My-ETS-14	XP_021352365.1	22.83	0.5625	0.05	0.703333	2.18667	2.21	0.85	0.94	0	2.76	0	0.4	1.93	0.27
	My-ETS-15	XP_021352366.1	0	0	2.74667	0.733333	0.956667	0	0	0	0	0	0	0	0	0
	My-ETS-16	XP_021352367.1	0.14	0.5025	0	3.31333	0.08	0	0	0	0	0	0	0	0	0
	My-ETS-17	XP_021352368.1	10.765	9.1225	10.95	22.02	17.22	0	0	0	0	0	0.51	0	0	0
	My-ETS-18	XP_021352369.1	11.155	1	1.94333	3.33333	3.48	0	0	0	0.63	1.83	0.35	0.14	0	0
	My-ETS-19	XP_021353499.1	1.08	0.95	5.15333	12.14	15.8533	0.19	0.22	0	0.43	1.71	2.97	2.08	4.61	0.83
	My-ETS-20	XP_021353500.1	5.02	0.7975	2.05667	2.37333	3.48333	0.09	0	0	0	0.06	0	0	0.06	0
	My-ETS-21	XP_021353501.1	0	0	0	0	0	0	0	0	0	0	0	0	0	0
	My-ETS-22	XP_021354307.1	0	0.7075	0	0	0.08	0.17	0.39	0.08	0.2	0.44	0	0	0	0
	My-ETS-23	XP_021358310.1	194.37	3.7825	4.08667	8.94333	19.6533	0	0	0.34	7.93	6.93	4.9	2.96	5.05	6.98
	My-ETS-24	XP_021358311.1	105.96	2.19	2.72	12.8967	10.43	0	0	0	0.44	0	0	0	0	0.31
	My-ETS-25	XP_021358348.1	0.025	0.1	0.0466667	0.806667	0.253333	0.06	0	0	6.59	17.13	12.41	6.94	7.71	8.91
	My-ETS-26	XP_021360844.1	23.455	12.3825	5.15333	14.58	12.8967	3.65	1.69	0.07	6.24	0.03	1.33	1.68	0.02	0.01
	My-ETS-27	XP_021360845.1	4.985	3.6825	0.183333	2.56	2.62	0	0	9.56	0	5.16	0	0	2.3	1.4
	My-ETS-28	XP_021361480.1	62.46	15.045	17.8233	157.69	94.2233	0.81	0.89	0.55	9.48	4.1	0.85	1.3	10.06	1.53
	My-ETS-29	XP_021363779.1	113.91	7.3225	17.6733	178.9	58.44	0	0	0	0	0	0	0	8.14	0
	My-ETS-30	XP_021363787.1	6.13	1.645	0	10.8267	8.21667	0.1	0.46	0.48	0.32	0.39	0.22	0.37	0	0.39
	My-ETS-31	XP_021363796.1	0	1.0975	0.326667	5.99	4.00333	0	0	0	0	0	0	0	0	0
	My-ETS-32	XP_021365446.1	42.98	18.9975	77.6467	177.667	228.003	0	0	0.33	2.42	1.01	2.94	5.04	21.22	2.44
	My-ETS-33	XP_021366637.1	0.22	2.5175	2.33	3.72667	1.02667	0	0	0	0	0	0	0	0	0
	My-ETS-34	XP_021366638.1	0.06	0.025	0	3.22333	7.67667	17.52	25.63	5.07	1.37	11.49	8.24	7.93	8.36	5.81
	My-ETS-35	XP_021366639.1	0	0.585	0	0.86	0.84	8.83	4.43	0	4.43	1.04	0.91	0	0	0.67
	My-ETS-36	XP_021366640.1	0.275	0.3425	0.963333	3.94333	2.55	0	0.17	1.54	0.45	0.77	0.11	0	0	0
	My-ETS-37	XP_021366641.1	0	0	0	0	0.0366667	0	0	29.69	2.64	0.1	0.04	0.08	0.08	0.06
	My-ETS-38	XP_021367990.1	24.72	8.1725	11.37	17.1767	22.2033	0.59	0	0	1.54	0	0	0	0.57	0
	My-ETS-39	XP_021367998.1	0.79	0	0	0	0.503333	0	0	0	0	0	0	0	0	0
	My-ETS-40	XP_021368006.1	3.065	0.3225	0.0633333	0.206667	1.43667	0	0.32	0.26	0	1.64	0	0.77	0.28	0
	My-ETS-41	XP_021369537.1	0	1.0375	0.0566667	0.283333	0.0166667	0	0	0	0.06	0.45	0	0	0.05	0
	My-ETS-42	XP_021376328.1	0	0.0725	0.84	1.12333	0.326667	0.03	0.04	0.1	0	5.64	0.59	0.3	0.73	0.29
	My-ETS-43	XP_021376329.1	1.66	0.3275	0.57	4.62667	4.21667	0	0	0	0.68	0	0	0	0	0
	My-ETS-44	XP_021376330.1	0	0	0	0.613333	0.09	0	0	0	0	0	0	0	0	0
